# Supplementary material
Source: publisher figshare collection journal article supplement (https://tandf.figshare.com/ndownloader/files/13839767)
Supplement: Supplementary file 1 [file 13839767]

**Nonlinear Unidimensionality in Communication Science:  
Tests, Examples, and Implications**

**Supplementary Tables**

**Supplementary Table 1***Example of Guttman Indicators*

| <i>Table 1a</i> |           | ITEM 2    |         |       |
|-----------------|-----------|-----------|---------|-------|
|                 |           | INCORRECT | CORRECT | TOTAL |
| ITEM 1          | CORRECT   | 1         | 8       | 9     |
|                 | INCORRECT | 1         | 0       | 1     |
|                 | TOTAL     | 2         | 8       | 10    |
| <i>Table 1b</i> |           | ITEM 3    |         |       |
|                 |           | INCORRECT | CORRECT | TOTAL |
| ITEM 1          | CORRECT   | 8         | 1       | 9     |
|                 | INCORRECT | 1         | 0       | 1     |
|                 | TOTAL     | 9         | 1       | 10    |
| <i>Table 1c</i> |           | ITEM 3    |         |       |
|                 |           | INCORRECT | CORRECT | TOTAL |
| ITEM 2          | CORRECT   | 7         | 1       | 8     |
|                 | INCORRECT | 2         | 0       | 2     |
|                 | TOTAL     | 9         | i       | 10    |

**Supplementary Table 2***Inter-item Correlations, Item Means, and Item-Strength Predictions*

|        | ITEM 1 | ITEM 2 | ITEM 3 | ITEM MEAN |
|--------|--------|--------|--------|-----------|
| ITEM 1 |        | .67    | .11    | .90       |
| ITEM 2 | .67    |        | .17    | .80       |
| ITEM 3 | .11    | .17    |        | .10       |

*Note:* Coefficients in the lower diagonal display inter-item correlations; coefficients in the upper diagonal display item strength predictions used in testing the fit of the Guttman model.

**Supplementary Table 3**

*Fourfold Table Notation*

|        |           | ITEM i    |         |     |
|--------|-----------|-----------|---------|-----|
|        |           | INCORRECT | CORRECT |     |
| ITEM j | CORRECT   | a         | b       | p   |
|        | INCORRECT | c         | d       | q   |
|        |           | q'        | p'      | 1.0 |

**Supplementary Table 4**

*Original Items from Cho et al. (2014) and Means and Inter-Item Correlations Computed from a Sample (N=366)*

| Original Items                                                 | <i>M</i> | 1    | 2    | 3    | 4    | 5    |
|----------------------------------------------------------------|----------|------|------|------|------|------|
| 1. The story showed something that could happen in real life.  | 4.31     | 1.00 |      |      |      |      |
| 2. The event in the story portrayed real life situations.      | 4.16     | .75  | 1.00 |      |      |      |
| 3. The story could actually happen in real life.               | 4.28     | .79  | .73  | 1.00 |      |      |
| 4. Real people would not do the things shown in this story.*   | 3.71     | .34  | .30  | .36  | 1.00 |      |
| 5. The story is not something that would happen in real life.* | 3.92     | .43  | .37  | .45  | .63  | 1.00 |

*Note:* \*indicates a reverse-scored item.

**Supplementary Table 5***Predicted and Obtained Correlations among Plausibility Items*

| Item Pair | Absolute MD | Strength Ratio | <i>r</i> |
|-----------|-------------|----------------|----------|
| 1,2       | .15         | .79            | .75      |
| 1,3       | .03         | .95            | .79      |
| 1,4       | .60         | .46            | .34      |
| 1,5       | .39         | .58            | .43      |
| 2,3       | .12         | .83            | .73      |
| 2,4       | .44         | .58            | .30      |
| 2,5       | .24         | .73            | .37      |
| 3,4       | .57         | .48            | .36      |
| 3,5       | .36         | .61            | .45      |
| 4,5       | .20         | .80            | .63      |

*Note:* Absolute MD indicates the absolute value of the mean difference between items; *r* indicates the inter-item correlation.
